# Supplementary material for: Fast-Response Micro-Phototransistor Based on MoS2/Organic Molecule Heterojunction
Source: MDPI journal article supplement (doi:10.3390/nano13091491), 2023-04-27
Supplement: s1 [file s1]

Supplementary Material:

# Fast-Response Micro-Phototransistor Based on MoS<sub>2</sub>/ Organic Molecule Heterojunction

Shaista Andleeb <sup>1,2,3,\*</sup>, Xiaoyu Wang <sup>2,4</sup>, Haiyun Dong <sup>2</sup>, Sreeramulu Valligatla <sup>2</sup>, Christian Niclaas Saggau <sup>1,2,3</sup>, Libo Ma <sup>2</sup>, Oliver G. Schmidt <sup>1,2,3,5</sup> and Feng Zhu <sup>6,\*</sup>

<sup>1</sup> Material Systems for Nanoelectronics, Chemnitz University of Technology, 09107 Chemnitz, Germany; c.n.saggau@ifw-dresden.de (C.N.S.); oliver.schmidt@main.tu-chemnitz.de (O.G.S.)

<sup>2</sup> Leibniz-Institute für Festkörper- und Werkstofforschung Dresden, 01069 Dresden, Germany; xiaoyuwangsci@163.com (X.W.); donghaiyun@iccas.ac.cn (H.D.); srihcu08@gmail.com (S.V.); l.ma@ifw-dresden.de (L.M.)

<sup>3</sup> Research Center for Materials, Architectures, and Integration of Nanomembranes (MAIN), Chemnitz University of Technology, 09126 Chemnitz, Germany

<sup>4</sup> Department of Physics, School of Science, Hainan University, Haikou 570228, China

<sup>5</sup> School of Science, Dresden University of Technology, 01069 Dresden, Germany

<sup>6</sup> State Key Laboratory of Polymer Physics and Chemistry, Changchun Institute of Applied Chemistry, Chinese Academy of Sciences, Changchun 130022, China

\* Correspondence: s.andleeb@ifw-dresden.de (S.A.); zhufeng@ciac.ac.cn (F.Z.)

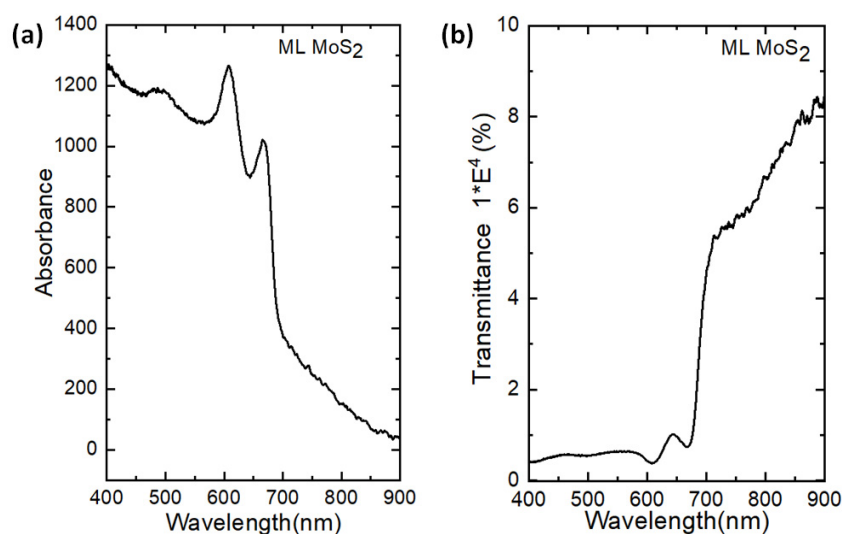

**Figure S1.** (a) Absorption spectra of ML MoS<sub>2</sub>. (b) Transmittance spectra of ML MoS<sub>2</sub>.

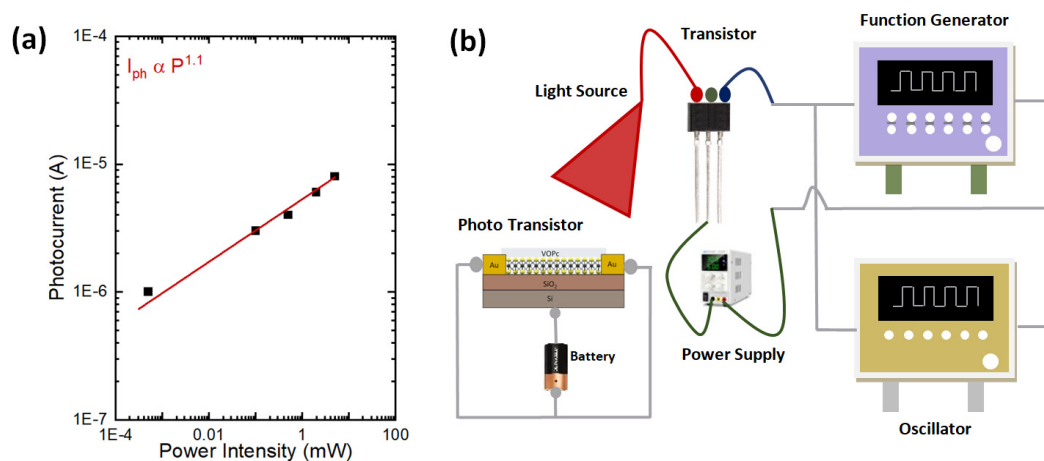

**Figure S2.** (a) Power intensity-dependent photocurrent measurements. (b) Measurement Setup of the phototransistor.

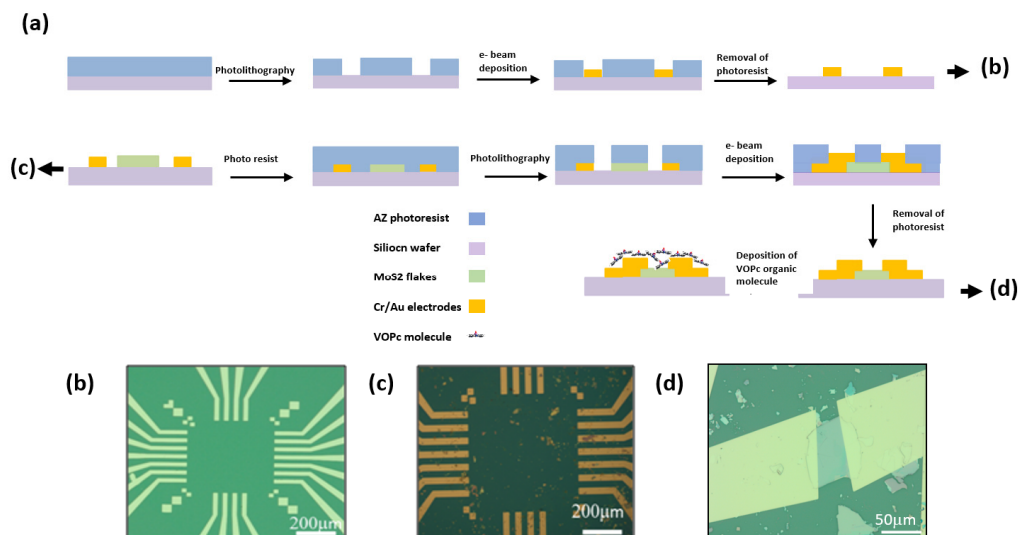

**Figure S3.** Schematic diagram of the device fabrication process and optical images (a) Schematic diagram of MoS<sub>2</sub> device fabrication process with all steps, see Fig. S3. (b) Optical image of device Cr/Au electrodes, see Fig. S3. (c) Optical image of MoS<sub>2</sub> with Cr/Au electrodes, see Fig. S3. (d) Optical image of MoS<sub>2</sub> device.

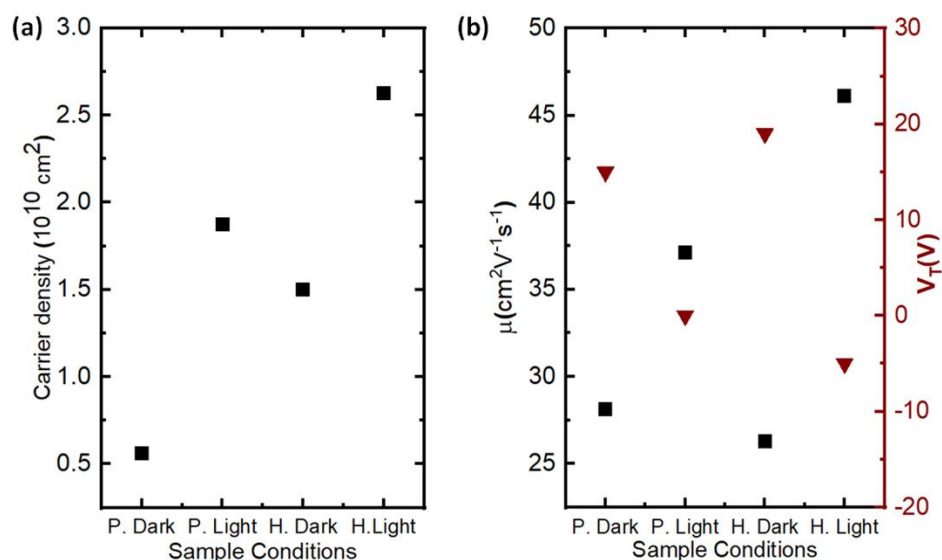

**Figure S4.** (a) Carrier densities of Pristine (P) MoS<sub>2</sub> and VOPc/MoS<sub>2</sub> heterojunction (H) phototransistor devices in dark and light conditions. (b) Mobilities and the threshold voltages [47] of the Pristine (P) MoS<sub>2</sub> and the VOPc/MoS<sub>2</sub> heterojunction (H) phototransistor devices in dark and light conditions.

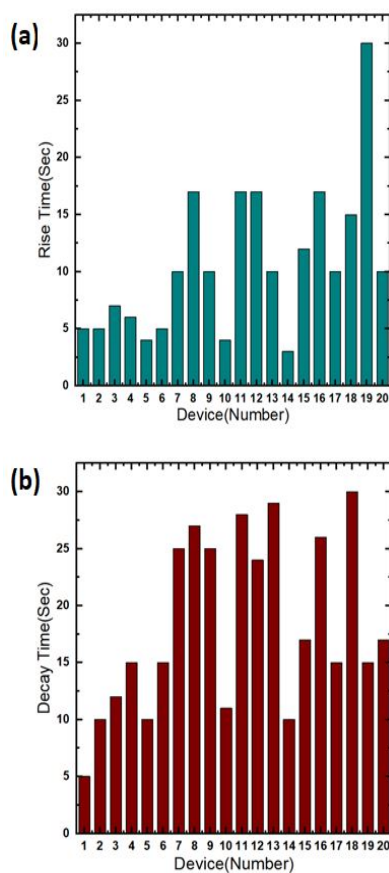

**Figure S5.** Statistics data of phototransistors (a) Statistics data of photo rise time from 20 MoS<sub>2</sub> phototransistors. (b) Statistics data of photo decay time from 20 MoS<sub>2</sub> phototransistors.

**Table S1.** State of Art of the response time of VOPc/MoS<sub>2</sub> heterojunction phototransistor.

| <b>Photodetectors<br/>Structure</b> | <b>Thickness<br/>(nm)</b> | <b>Photoresponse<br/>(Sec)</b> | <b>Reference</b> |
|-------------------------------------|---------------------------|--------------------------------|------------------|
| CuPc/MoS <sub>2</sub>               | 2                         | 5                              | [51]             |
| Perovskite/Graphene                 | SL                        | 5.3                            | [54]             |
| C8-BTBT/Graphene                    | SL                        | 0.025                          | [55]             |
| Perovskite/Graphene                 | SL                        | 0.54                           | [56]             |
| ZnPc/MoS <sub>2</sub>               | SL                        | 0.008                          | [35]             |
| <b>Our work</b>                     | <b>230</b>                | <b>0.011</b>                   | <b>This work</b> |
